# Supplementary material for: Investigating the nature of active forces in tissues reveals how contractile cells can form extensile monolayers
Source: Springer Nature journal article supplement (doi:10.1038/s41563-021-00919-2), 2021-02-18
Supplement: MOESM8 [file 41563_2021_919_MOESM8_ESM.xlsx]

## Sheet: Feuil1
Figure 2d	Simulations
		Control
	RMS Velocity	R1	R2	R3	R4	R5	R6	R7	R8	R9	R10	R11	R12	R13	R14	R15	R16	R17	R18	R19	R20	R21	R22	R23	R24	R25	R26	R27	R28	R29	R30
		3.1094	3.05926	3.08894	3.03779	3.13736	3.0367	3.0737	3.12512	3.15605	3.01623	3.11588	3.15514	3.09736	3.08717	3.08936	3.06127	3.1017	3.10215	3.02353	3.15897	3.12886	3.07572	3.16232	3.10657	3.07015	3.1878	3.17519	3.11003	3.1245	3.11741
		Without active intercellular forces
		R1	R2	R3	R4	R5	R6	R7	R8	R9	R10	R11	R12	R13	R14	R15	R16	R17	R18	R19	R20	R21	R22	R23	R24	R25	R26	R27	R28	R29	R30
		1.15565	1.12874	1.0903	1.05877	1.12866	1.1691	1.19658	1.22356	1.12119	1.18765	0.928927	0.914042	1.00634	1.13948	1.19667	1.23722	0.913741	1.16865	1.16023	1.34639	1.06132	1.31555	1.12399	1.18886	1.07961	1.12856	1.15061	1.10392	1.09097	1.06637
Figure 2e	Simulations
		Control
	velocity correlation length	R1	R2	R3	R4	R5	R6	R7	R8	R9	R10	R11	R12	R13	R14	R15	R16	R17	R18	R19	R20	R21	R22	R23	R24	R25	R26	R27	R28	R29	R30
		18.5135	18.3848	18.2194	18.53	19.1603	18.5654	18.5754	18.1746	19.4414	18.4798	19.3534	18.156	19.7922	18.3386	18.5505	19.0653	19.0353	18.5854	18.5469	18.6164	18.6727	18.9773	17.5939	18.5547	18.5147	18.989	19.1676	19.0135	19.1296	19.3092
		Without active intercellular forces
		R1	R2	R3	R4	R5	R6	R7	R8	R9	R10	R11	R12	R13	R14	R15	R16	R17	R18	R19	R20	R21	R22	R23	R24	R25	R26	R27	R28	R29	R30
		9.91846	11.0285	11.7019	11.2553	10.2499	10.6247	10.8175	11.9114	10.1784	10.2466	11.204	10.6402	10.2509	10.7493	10.8622	11.0033	11.088	10.325	10.6577	11.0743	10.3788	10.4599	10.0159	10.4071	11.5812	11.9136	11.3835	9.97214	11.0765	10.0763
