# Supplementary material for: Investigating the nature of active forces in tissues reveals how contractile cells can form extensile monolayers
Source: Springer Nature journal article supplement (doi:10.1038/s41563-021-00919-2), 2021-02-18
Supplement: MOESM9 [file 41563_2021_919_MOESM9_ESM.xlsx]

## Sheet: Feuil1
Figure 3d	Velocity correlation length- Experiments
	E-cad KO	wt	E-cad KO_rescue E-cad	3t3
1	216.121	302.833	276	165.6
2	216.82	334.877	261.364	136.467
3	194.568	387.949	288.65	121.517
4	199.024	323.569	225.877	122.667
5	193.937	309.021	241.717	111.55
6	208.165	298.424	258.835	124.967
7	199.238	323.723	340.798	126.117
8	214.667	358.748	264.014	116.683
9	226.634	258.376	361.02	129.305
10	211.381	287.909	240.21	107.146
Figure 3e	Velocity
	WT	E-cad KO
	4.15199	0.642608
	4.44143	0.29199
	4.57535	0.389766
	2.3345	0.298501
	2.08832	0.586654
	1.12848	0.270167
	1.95537	1.06695
	2.50791	0.22014
	2.301	1.00054
	2.92419	1.17562
Figure 3f	Mean traction force
	WT													E-cad KO
	1	2	3	4	5	6	7	8	9	10	11			1	2	3	4	5	6	7	8	9	10	11
Time	Average_traction	Average_traction	Average_traction	Average_traction	Average_traction	Average_traction	Average_traction	Average_traction	Average_traction	Average_traction	Average_traction			Average_traction	Average_traction	Average_traction	Average_traction	Average_traction	Average_traction	Average_traction	Average_traction	Average_traction	Average_traction	Average_traction
0	85.3679	59.8443	119.73	91.8555	196.1	121.493	87.907	42.6928	88.1416	81.4936	109.536			363.168	555.175	432.15	268.651	187.254	219.774	379.342	345.793	377.847	165.207	151.245
10	80.7303	59.4108	115.369	89.8944	189.467	116.176	84.9892	43.0815	84.8948	81.1386	107.654			352.605	556.085	427.545	268.925	185.702	212.767	380.519	352.382	380.253	166.851	151.208
20	77.2465	57.6758	112.807	90.3777	182.367	113.37	84.2575	42.1358	85.2815	77.6225	104.81			340.351	570.095	416.381	260.077	179.408	202.99	378.035	349.743	376.02	152.162	145.843
30	72.5947	57.0058	109.168	89.793	184.178	109.199	83.7585	41.5741	85.0097	79.4695	104.552			328.619	564.525	407.033	259.084	178.653	192.792	370.736	344.359	379.997	142.464	138.245
40	71.8937	56.3111	111.337	88.3691	176.231	110.099	80.2076	43.0998	83.0777	79.6433	102.062			319.193	558.413	398.374	254.354	176.564	190.165	371.843	336.914	375.141	138.16	134.57
50	71.6941	57.2624	112.375	86.7897	177.362	109.71	79.5865	43.3385	82.0219	77.7485	100.758			321.592	568.714	412.62	255.211	173.576	193.745	369.043	328.3	371.713	138.57	130.515
60	71.3625	55.4542	109.091	87.0384	176.39	108.692	78.6065	43.1843	81.9238	77.5199	104.69			314.699	572.052	405.866	252.488	177.162	200.39	369.534	330.831	375.058	138.623	126.964
70	73.8928	54.7408	107.284	87.9116	172.942	109.494	80.6797	42.1767	82.1117	77.9813	104.064			311.564	566.586	413.767	256.851	173.224	202.968	378.825	337.246	368.104	137.286	124.467
80	74.6412	55.0436	105.273	87.148	171.714	105.7	79.4849	43.241	83.9709	80.4342	104.673			310.196	564.349	424.47	251.786	176.03	199.265	364.723	343.729	360.505	135.206	124.329
90	73.0124	54.8963	101.805	87.9018	172.543	105.128	78.0327	43.0315	83.2016	79.8991	104.796			304.71	557.1	430.077	250.06	178.854	194.386	373.423	345.293	365.732	136.008	124.067
100	70.6998	54.2415	100.329	86.5427	168.576	102.252	78.2925	42.4989	81.0955	78.6477	103.765			304.051	559.501	428.968	248.552	178.434	194.058	376.762	336.761	359.169	135.025	122.465
110	69.2209	54.9649	100.642	86.8891	164.007	102.74	78.8977	42.898	79.723	78.8113	105.332			306.059	563.704	426.37	242.381	177.062	190.053	368.484	327.722	359.129	141.205	125.23
120	68.0752	55.0958	100.356	86.2573	161.326	99.3226	76.6363	43.3122	79.5044	76.73	104.943			296.364	563.029	415.81	245.622	170.312	188.325	362.542	325.317	359.304	143.074	124.995
130	66.5498	54.9537	97.4043	84.7838	162.13	98.2814	73.3049	43.4784	80.5287	76.1886	104.026			291.965	568.117	409.587	244.134	178.754	181.89	364.581	316.907	357.313	137.723	121.747
140	64.5712	54.2798	94.3325	84.797	159.402	95.6702	73.1172	43.9391	80.0025	76.3385	101.408			291.151	544.101	408.149	237.18	167.814	176.248	364.894	309.605	356.838	136.747	119.76
150	62.2127	53.2084	89.7036	81.968	155.573	95.0452	71.6838	43.3249	79.9293	76.8664	99.899			283.61	553.541	403.604	234.964	171.637	176.037	361.664	306.536	353.651	138.762	119.111
160	61.7413	53.2186	88.9455	80.8942	152.393	92.3466	71.5896	42.8075	76.9202	75.9082	100.992			288.516	552.372	408.199	231.82	164.493	177.392	365.605	300.098	351.021	135.902	120.254
170	60.882	51.7259	87.4127	79.7529	147.605	90.2938	69.4266	42.7561	75.7408	74.5645	99.3807			285.786	550.153	401.04	232.374	167.862	171.113	355.945	295.346	353.088	132.684	115.42
180	59.4583	50.3445	84.3277	77.6474	142.237	88.0908	67.9322	43.9232	76.7536	73.771	99.9788			284.997	549.757	388.243	229.642	172.738	173.45	361.785	298.616	358.991	130.865	118.224
190	55.6595	50.6571	80.3974	77.0754	139.083	87.9408	66.4167	44.0271	76.1298	70.4907	98.8579			280.935	539.889	388.25	225.172	168.874	172.086	358.839	296.869	360.229	132.379	116.761
200	55.1163	49.9376	82.3002	75.5968	141.273	85.2368	65.4252	43.1992	73.4279	71.881	100.489			283.683	534.388	384.882	222.11	170.219	173.631	360.973	292.947	352.449	133.923	119.053
210	54.1495	48.8457	79.4349	74.9962	135.392	80.739	63.1061	42.7816	71.8846	71.0883	100.652			278.614	529.696	379.536	215.166	171.508	174.729	357.357	288.586	349.689	131.737	115.768
220	54.0484	48.4312	78.1594	71.9801	129.955	77.6648	62.6961	43.7981	70.2612	70.3376	98.9219			281.509	510.845	387.278	210.786	170.75	172.412	351.027	291.898	350.253	132.942	119.169
230	53.2502	48.2911	79.6006	71.4601	126.421	76.8827	62.3379	42.3603	68.7524	69.0938	98.9106			283.705	515.16	373.566	209.994	169.539	178.178	345.359	288.014	344.561	131.202	118.491
240	51.818	48.4121	76.1433	71.3056	129.023	74.9817	60.4253	42.6302	68.0357	68.5157	96.2364			282.908	508.111	378.77	209.644	176.649	168.925	344.931	278.377	341.089	131.804	119.341
250	52.6364	46.895	76.3294	70.468	128.631	71.7324	59.7563	42.0146	68.0882	68.2215	93.6449			274.143	503.53	370.004	205.27	175.681	170.546	331.428	278.031	335.217	126.088	115.689
260	50.6941	45.3883	74.5569	70.4709	126.776	70.8891	57.9445	40.9295	65.4274	67.1398	91.9713			267.571	503.862	371.563	213.261	169.982	168.644	341.437	284.141	332.637	121.009	121.071
270	48.5923	45.1659	70.8148	69.3315	125.594	70.085	57.7468	41.7095	63.8815	66.6142	92.597			272.795	492.767	371.108	214.412	171.832	173.594	336.536	286.466	328.543	122.59	116.044
280	47.9006	44.4352	71.797	67.9718	124.918	68.7618	56.762	41.0469	63.4045	65.0815	92.8561			270.603	493.336	368.396	205.495	171.277	170.087	345.21	291.676	323.853	124.459	114.461
290	45.59	43.7308	69.6263	66.9757	121.949	68.2871	54.5903	40.4013	61.7701	63.951	88.2083			264.93	502.597	347.149	205.955	160.586	174.828	344.266	286.187	321.963	121.416	114.67
300	45.95	42.9861	69.4108	67.6009	118.085	67.4682	53.2117	39.5699	61.0395	61.8606	89.4997			265.684	493.388	355.585	198.435	161.464	171.157	336.462	286.675	322.294	122.14	115.049
310	44.2241	43.0186	64.8262	66.4261	115.548	66.8587	52.7797	39.2183	58.8784	60.9093	90.6025			261.561	489.547	363.223	195.443	158.219	171.545	338.016	277.687	321.346	120.963	112.778
320	43.5617	43.142	66.3827	65.5555	115.597	65.876	51.703	39.0544	56.8336	59.5099	89.3633			265.301	482.942	362.068	195.681	156.186	171.225	337.565	271.019	328.084	118.385	108.573
330	43.6324	42.9582	64.2564	65.361	113.609	63.739	51.6828	38.613	56.4925	58.2481	87.3945			256.99	476.984	352	188.944	155.16	168.392	342.177	274.646	331.896	115.045	106.07
340	42.3357	41.4135	64.697	63.8062	112.391	62.7491	50.9434	38.7342	55.4164	57.1811	86.2284			252.177	477.314	346.673	186.727	162.661	170.76	341.078	270.246	327.12	118.707	104.997
350	41.0249	40.6907	63.5346	62.2235	110.687	62.417	50.2064	38.6937	53.9263	56.5889	84.8932			246.524	485.791	338.053	188.608	156.107	171.44	335.68	269.914	324.771	113.105	101.362
360	40.8396	40.2222	62.6898	60.4027	113.155	62.0607	50.9875	38.2138	54.322	56.0027	85.0672			247.703	480.75	329.636	186.968	156.106	165.642	326.223	267.42	325.103	111.946	99.9084
370	40.9506	40.3095	62.307	59.7217	108.954	61.5619	49.7606	38.0478	53.5859	54.5147	83.0414			243.486	481.912	320.435	185.72	155.089	163.059	325.649	263.132	320.241	110.771	104.033
380	39.4296	40.5813	61.6237	59.8471	106.619	61.5346	49.189	37.2376	52.1553	53.436	82.8079			240.345	470.632	321.276	184.962	150.365	165.412	324.05	256.019	315.682	104.977	99.9868
390	38.5859	39.6732	59.1238	59.6328	103.858	59.7605	48.3543	36.4191	50.6864	53.9679	82.5041			237.695	457.855	318.863	180.668	146.967	163.268	318.769	256.12	321.41	106.084	99.1795
Figure 3g	Area -Experiments
			WT												Ecad KO
	Time (hours)		1	2	3	4	5	6	7	8	9	10			1	2	3	4	5	6	7	8	9	10
	1		772.063	800.378	817.466	828.126	809.44	853.441	780.581	817.206	815.938	822.548			760.557	796.395	805.425	793.354	809.193	772.167	757.317	760.323	785.862	758.57
	2		651.914	738.882	760.259	805.306	777.597	790.186	761.629	796.715	735.792	880.584			748.707	766.798	765.898	781.576	775.613	756.942	744.046	735.34	745.133	743.216
	3		615.502	695.335	706.783	724.621	713.384	747.938	720.18	791.529	714.281	744.03			737.802	757.35	749.093	739.867	734.051	730.606	725.159	707.334	714.778	704.455
	4		566.939	669.753	683.51	776.863	693.57	714.146	694.274	763.874	682.305	840.67			727.275	723.456	746.164	735.652	724.192	709.22	689.523	675.001	675.903	690.05
	5		548.345	636.141	669.653	723.247	647.598	703.79	671.998	757.976	666.004	811.105			674.23	690.915	716.482	703.446	693.415	677.797	646.198	635.539	669.6	678.913
	6		480.408	708.26	663.182	704.513	647.122	668.866	667.961	738.547	612.328	717.488			664.127	664.912	714.423	685.618	661.455	643.002	647.323	629.669	642.116	667.451
	7		498.184	604.988	637.501	678.565	625.272	657.617	653.715	732.471	593.815	747.096			661.093	651.903	683.042	665.597	638.685	632.515	632.176	607.27	625.316	630.006
	8		481.138		609.227		614.165	626.246	643.954	687.436	553.813	722.926			655.71	618.762	674.384	647.34	626.585	604.419	617.784	583.605	574.35	620.13
	9						596.016	617.361		674.405	596.442	686.303							604.671		593.326
	10						558.832
Figure 3h	Aspect Ratio
			WT												Ecad KO
	Time (hours)		1	2	3	4	5	6	7	8	9	10			1	2	3	4	5	6	7	8	9	10
	1		1.66695	1.83659	1.80204	1.74742	1.72968	1.70047	1.72994	1.70625	1.76102	1.7008			2.02842	1.77169	1.73147	1.91424	1.92499	1.84795	1.95417	1.8888	1.97408	1.96937
	2		1.65163	1.79264	1.79617	1.72198	1.7051	1.67026	1.67958	1.69169	1.72679	1.61971			1.95858	1.74361	1.72575	1.89862	1.86114	1.86445	1.9277	1.91919	2.0217	1.85376
	3		1.59567	1.75344	1.77914	1.73854	1.7019	1.62053	1.64835	1.68261	1.65242	1.62839			1.89761	1.76999	1.73367	1.89946	1.8283	1.86535	1.93088	1.93731	2.03166	1.83702
	4		1.57919	1.70622	1.72505	1.71618	1.69097	1.62075	1.60382	1.68472	1.61555	1.59236			1.96469	1.80379	1.7216	1.91368	1.79008	1.87085	1.90823	1.90049	2.03955	1.81431
	5		1.55088	1.6498	1.67371	1.68815	1.63839	1.58425	1.59249	1.67842	1.5839	1.59178			1.92487	1.78918	1.7314	1.89323	1.77297	1.88765	1.89705	1.95152	2.03479	1.83481
	6		1.53398	1.59711	1.65908	1.65109	1.60358	1.58521	1.5829	1.64619	1.5612	1.57973			1.96337	1.79334	1.72838	1.91122	1.77353	1.87888	1.91588	1.92361	2.0415	1.85726
	7		1.51522	1.61714	1.64912	1.63417	1.57305	1.54515	1.56406	1.61507	1.52697	1.53787			1.89512	1.8095	1.70944	1.92483	1.76443	1.86193	1.92733	1.98444	2.03585	1.86525
	8		1.50862		1.62369		1.5339	1.53652	1.57012	1.59856	1.53091	1.50845			1.87894	1.81674	1.73683	1.92163	1.76331	1.88957	1.9363	1.96903	2.00431	1.88463
	9						1.54161	1.52333		1.57927	1.51226	1.49996							1.80473		1.94969
	10						1.52586
