# Supplementary material for: Investigating the nature of active forces in tissues reveals how contractile cells can form extensile monolayers
Source: Springer Nature journal article supplement (doi:10.1038/s41563-021-00919-2), 2021-02-18
Supplement: MOESM10 [file 41563_2021_919_MOESM10_ESM.xlsx]

## Sheet: Feuil1
Figure 4b	Traction force+Blebbistatin where yellow highlights drug addition
	WT												E-cad KO
Time	1	2	3	4	5	6	7	8	9	10			1	2	3	4	5	6	7	8	9	10
-130	66.4583	75.8806	50.9582	64.1814	72.996	106.53	106.706	102.946	111.798	127.747			223.938	195.3	221.514	221.117	212.324	235.254	224.787	238.208	223.465	242.081
-120	74.8889	86.0918	65.8757	83.1972	85.9078	118.62	123.262	113.756	119.653	143.844			235.75	210.901	240.415	232.145	225.897	247.566	237.983	253.93	243.464	258.316
-110	82.9008	91.8948	71.7298	93.8648	95.7033	121.167	126.125	112.735	119.567	145.857			244.765	221.312	247.903	248.304	237.611	260.18	250.645	271.746	259.368	276.283
-100	83.7761	95.9883	75.3937	101.739	97.5928	118.674	123.437	110.65	116.319	137.503			248.712	224.937	251.679	257.624	246.213	261.621	256.538	276.03	263.98	282.797
-90	81.4592	94.0127	76.4908	104.809	97.1835	111.09	116.238	103.392	110.536	127.991			253.927	223.978	249.725	262.525	251.401	257.519	244.557	270.357	256.637	275.534
-80	77.4215	91.1994	72.042	102.439	98.2769	102.538	106.648	97.0711	103.106	118.313			259.377	223.888	249.403	260.344	258.369	242.886	233.347	254.992	242.509	258.812
-70	73.7159	89.0654	67.2642	98.7787	96.8467	98.5163	101.027	93.2905	97.0578	114.069			256.542	220.707	245.29	255.992	258.519	232.118	225.391	243.075	229.391	240.927
-60	73.1145	86.0216	65.0039	95.1242	92.4981	93.7682	95.3107	89.6496	95.965	106.444			259.044	220.905	245.853	254.399	264.79	226.272	219.404	237.765	220.576	227.213
-50	71.6108	84.4875	62.8145	90.7134	89.8708	92.9797	93.9129	93.8064	97.5175	106.23			264.315	223.362	248.191	255.289	259.634	219.563	213.015	232.149	208.714	216.412
-40	70.8804	84.9933	63.612	87.6681	86.7658	93.7061	96.3347	93.4169	97.16	110.064			261.853	222.345	244.71	260.576	263.189	213.213	210.027	227.047	203.986	210.462
-30	69.3986	83.4813	61.9289	85.3761	85.3473	94.5362	98.4191	91.9893	94.6614	108.618			266.168	226.125	245.559	260.672	264.162	208.651	206.797	222.865	200.046	206.618
-20	69.8321	84.3117	60.1254	86.3675	82.1676	92.2599	100.584	91.9751	90.4664	106.977			266.457	224.249	247.427	264.952	263.123	206.21	205.923	218.988	198.394	203.867
-10	67.8371	84.9198	60.4607	84.3735	82.4125	94.1608	101.306	91.1595	93.2761	109.391			265.7	221.016	246.148	267.697	266.858	205.807	205.766	217.923	195.139	202.168
10	61.191	66.8899	57.8652	79.5881	69.6571	61.5797	72.2124	61.595	64.4266	71.971			110.492	73.7364	81.5691	90.2311	112.025	132.576	135.945	169.57	168.285	196.158
20	37.4259	40.9551	27.4652	32.8825	32.3871	50.8168	63.0957	57.4979	54.1724	56.0877			85.8318	57.5264	60.4217	64.5131	83.2069	71.7263	60.9459	79.4864	90.6557	103.064
30	33.8183	31.0563	24.5528	29.7883	29.2474	32.3692	42.2441	40.6421	36.5846	37.2588			76.8218	50.4783	54.0699	56.0097	75.9017	58.1559	43.3558	57.9043	70.4742	71.8066
40	31.8528	26.303	22.3043	27.7016	26.087	23.5803	34.8944	34.7399	28.2581	27.6909			72.2376	46.3913	52.0767	53.3043	72.5011	53.8366	38.0361	50.1874	61.0629	59.5017
50	30.6991	23.4026	21.4722	27.1159	25.0863	19.6139	30.6709	31.1808	24.4853	23.3951			70.4349	45.2608	50.5431	51.5692	71.4815	51.4187	35.7124	46.6993	57.1876	52.5168
60	29.8413	21.8257	21.4945	25.3702	24.5309	17.8454	26.7268	28.5246	21.6401	21.4193			69.5171	44.5807	48.2479	48.947	70.0374	49.8735	34.4781	45.0624	54.584	49.7366
70	29.3236	21.59	21.5317	25.0115	23.6336	15.5168	23.0847	26.1167	18.8407	20.0252			68.5551	43.9713	46.3209	47.3832	68.4979	51.2494	33.204	43.5758	52.9382	47.1341
80	29.1487	20.7433	22.0039	24.3222	22.8767	14.2773	18.1221	23.1454	16.5414	18.8166			67.8918	43.6127	44.0378	45.1553	66.5514	52.1683	32.1667	42.308	52.1133	45.5187
90	29.0246	20.3487	21.0139	23.561	22.2825	13.922	16.9884	21.9637	15.5356	17.9798			64.7595	40.8727	40.4363	42.6588	65.363	50.6409	31.2038	41.2328	51.3659	44.1175
100	28.2258	19.5733	20.7809	23.1282	22.3723	13.8128	16.4366	21.2111	14.7602	17.4918			62.6591	41.5507	39.0692	40.888	62.2526	49.5071	30.2357	40.3697	50.4238	42.8146
110	28.2136	19.7605	20.9007	23.2563	22.0309	13.2463	15.5385	21.2538	14.6322	16.8167			62.7447	40.734	38.0518	39.9829	60.1218	48.482	29.451	39.4806	49.9314	41.8425
120	28.412	19.7453	20.8171	23.2433	22.0862	13.6892	16.1378	21.5433	14.4641	17.2889			62.6926	40.2309	37.5057	39.6353	59.8309	47.6053	29.2593	38.8007	48.9455	42.3297
130	28.2897	19.5677	21.0582	23.0512	22.2122	12.8144	15.4913	21.5333	14.3001	16.9041			61.9542	40.4719	37.3957	38.8543	59.8848	46.8348	28.7163	38.3464	48.713	41.7031
140	27.9082	19.723	20.7921	23.5035	22.0405	12.7465	15.0947	21.2303	13.9313	16.5742			61.6883	40.2601	36.7174	38.2527	59.3422	45.8444	28.4529	38.1886	48.5757	42.191
150	27.8732	19.4037	21.5443	20.8806	21.9395	12.689	15.2082	20.8991	13.8582	16.4155			60.3929	40.5045	36.4337	37.9135	58.0314	45.1876	27.9611	37.651	48.3942	42.4164
160	27.6918	19.2391	21.8146	21.3777	21.9671	12.6564	15.4813	20.8502	13.9143	15.9604			60.6801	41.9624	35.5999	38.168	56.9694	44.8287	27.532	37.1989	47.9221	42.1056
170	27.4992	19.3171	21.6751	20.7743	21.9501	12.5885	15.7516	21.2149	14.2542	15.7566			60.7836	40.8457	34.4056	37.6568	56.0703	44.3492	27.3394	37.1225	48.1586	42.0018
180	27.3912	19.1493	21.7292	21.0684	22.0129	13.0978	15.9951	20.9687	14.1961	15.893			60.9681	41.4011	34.1003	37.5062	56.2088	43.4179	26.8958	37.2045	47.9609	41.3082
190	27.6386	19.0447	22.385	21.0151	21.3931	12.883	15.9523	20.8313	14.133	15.7536			60.8009	40.4743	33.3652	36.5536	55.7165	42.8824	26.4872	36.7806	47.1951	40.7052
200	27.5742	18.9594	22.2819	20.7962	21.4061	12.8652	15.7766	20.6381	13.9612	16.0541			59.9027	39.7573	32.7502	35.4084	55.1912	42.5356	26.7315	49.3263	47.7395	40.5972
210	26.9679	18.9607	21.9453	20.1657	21.3326	12.6041	15.3476	20.5142	13.2836	16.1119			59.5975	40.6159	32.2221	35.0375	54.4488	42.478	26.6678	46.1935	47.873	40.9044
220	27.185	18.7914	21.5624	20.0171	21.1539	12.4424	15.2686	20.211	13.3887	15.8958			59.2139	39.9199	31.7137	34.6167	54.6467	41.8423	26.5696	44.8086	47.6978	41.3579
230	27.167	18.4734	21.3752	20.275	20.8301	12.0973	14.8084	20.4653	13.3858	16.3157			58.9886	40.0716	31.6337	34.8285	54.443	41.4409	26.7837	43.5099	47.3	41.1877
240	27.0669	18.3845	21.551	20.3297	20.758	12.2734	15.0932	19.9926	13.2585	15.767			57.6736	39.2872	31.5075	34.6357	54.4635	40.8169	26.1527	43.0686	47.1094	40.5093
250	26.9588	18.4941	21.5375	19.8033	20.6175	11.9666	14.8005	19.909	13.2918	15.1098			58.3581	40.2203	31.2534	34.3276	54.0108	40.2616	26.1861	42.7602	46.6141	40.1397
260	26.92	18.5805	21.5067	20.1468	20.5923	11.9304	14.7484	19.5295	12.6858	15.2742			58.0799	40.1052	30.7934	34.1494	54.3647	39.6884	26.1958	41.6725	46.3054	39.8428
270	26.773	18.2873	21.9296	20.0082	20.4276	11.4775	14.3472	19.7461	12.6486	14.809			58.1101	39.5861	31.0431	33.5194	53.9993	39.0731	26.2875	41.1905	46.0148	39.6028
280	26.8446	18.4073	21.3508	19.4585	20.2643	11.2628	14.3808	19.362	12.5477	14.3053			57.9102	38.895	31.2105	33.405	54.5161	38.4279	26.1107	40.6954	45.3945	39.6044
290	26.8998	18.396	22.3219	19.5822	20.0506	11.3918	14.1799	19.1412	12.3545	14.2911			56.2481	38.249	30.9379	32.9623	54.3217	38.0611	26.0738	40.4468	45.0943	39.3783
300	26.4884	18.4542	22.7247	20.2418	19.9421	11.3024	13.906	19.649	12.1034	14.1785			55.4397	37.3195	30.1284	32.4275	53.9985	37.6648	26.1127	39.942	44.33	38.8584
310	26.6863	18.4861	22.5676	19.808	19.8696	11.0619	13.8336	19.0938	11.8917	13.9496			54.6661	38.2749	29.7622	32.1042	53.966	37.288	26.3898	39.5376	43.8076	38.5157
320	26.5231	18.2259	22.756	19.8227	19.7121	10.9886	13.5162	18.7772	11.983	13.6753			55.2251	38.3308	29.2835	32.1881	53.5816	36.4863	26.1962	39.2604	43.3764	38.0366
330	26.1974	18.1415	22.5992	19.6187	19.5958	10.9817	13.855	18.8138	11.6569	13.7303			53.4661	37.2691	28.8388	31.0863	52.8717	36.2091	25.8277	38.9597	43.0144	38.0371
340	26.7235	18.2705	22.5385	19.7375	19.6896	11.1691	13.9402	19.1474	11.9381	13.9907			53.3838	37.4201	28.7655	30.4496	52.4154	35.5824	25.5245	38.6049	42.4011	37.4876
350	26.4815	18.2157	22.4905	19.0325	19.8838	11.0293	14.0138	19.3414	11.7474	14.0698			53.7924	37.831	28.1804	29.6823	51.9368	35.3903	25.2503	38.2099	41.9601	37.7315
360	26.9092	17.8916	21.8895	19.0569	19.8141	10.7593	13.5637	19.8705	11.8388	13.8964			53.1591	37.678	27.9093	29.3974	52.0227	34.6497	25.2772	38.0587	41.4338	36.8903
370	26.8515	17.7574	21.8432	19.2283	19.6542	10.4182	13.3469	19.6873	11.5675	14.0083			53.2257	37.456	27.612	29.4106	51.2317	34.182	24.8766	37.3124	40.8949	36.4592
380	27.2834	17.877	21.3454	18.6647	19.7085	10.5075	13.3716	19.2371	11.5432	13.9284			53.7036	37.6411	27.6834	29.2999	50.8116	33.8212	25.0752	37.114	40.6423	36.1316
390	27.042	17.652	21.5696	18.4576	19.8373	10.531	13.2188	19.5951	11.3805	14.0184			52.2747	37.2036	26.9146	29.1334	50.2999	33.7294	25.0357	36.9268	40.0599	35.5329
400	27.124	17.2366	21.4274	18.4164	19.5779	10.5716	13.1315	19.1584	11.3738	14.1602			52.6328	38.0194	26.1987	28.9317	49.9876	33.3241	28.9458	36.8224	40.0848	35.5078
410	27.4461	17.646	21.9615	18.1614	19.4703	10.6004	13.1488	19.2061	11.3702	14.0633			52.6722	37.9119	26.3098	28.8458	49.9714	33.2742	28.2839	36.3431	39.8088	35.0115
420	27.5154	17.5834	21.519	17.9911	19.365	10.6312	13.0418	19.1899	11.3366	13.8347			51.4453	37.6106	25.7679	28.5693	50.0101	32.8543	27.9639	36.4181	39.2026	34.795
430	27.9935	17.3217	21.6359	17.7207	19.1269	10.7009	13.0188	19.0692	11.4442	13.8373			51.7625	37.5968	25.8351	28.9055	49.741	32.4287	27.4573	35.7346	39.0919	35.1903
440	27.8582	16.9575	21.1322	17.5708	19.0186	10.4006	12.9503	18.9661	11.6114	13.6885			51.5716	38.2584	25.7295	29.0642	49.3501	32.1859	26.8679	35.4666	38.976	35.3139
450	27.6713	17.0231	20.6283	17.0936	19.1662	10.2318	13.4585	18.6909	11.3182	13.6748			51.5875	37.4011	25.9718	29.3033	49.3597	31.8235	26.9838	35.408	38.6034	34.7154
460	28.0766	17.0911	20.6603	17.4934	18.9301	10.2078	12.7286	18.7416	11.2944	13.5932			51.6868	38.0416	26.2809	29.1335	49.0348	31.7171	26.915	35.6698	38.6604	34.8938
470	27.9092	17.1061	21.4525	17.4192	18.9262	10.1934	13.0466	19.0607	11.097	13.9836			51.4566	37.4864	26.6456	29.5429	49.123	31.5134	26.7437	35.3632	38.5318	34.7748
480	28.0873	17.0001	22.4238	18.2551	18.9573	10.5142	12.9288	19.0011	11.2335	13.8869			52.4993	37.9344	26.6431	29.7013	48.9807	30.9107	26.651	34.5064	37.941	34.7092
490	28.1961	16.8838	21.6546	17.9809	19.466	10.4046	12.8969	18.5546	11.2385	13.6708			51.5268	37.8482	26.1109	29.8271	49.4177	30.8804	26.5529	34.7171	38.1373	34.8807
500	28.304	16.7773	22.0785	19.0246	19.1924	10.0572	12.8077	18.1569	11.1853	13.4917			52.0212	37.7606	25.9466	29.9935	49.0691	30.7912	26.4821	33.8883	38.4055	34.9072
Figure 4c	Area of focal adhesion									Length of focal adhesion
	WT	E-cadherin KO								WT	E-cadherin KO
	1.007	0.96								1.718	2.033
	0.656	0.903								1.628	1.985
	0.456	1.528								1.156	4.091
	0.447	1.537								1.175	2.246
	0.795	0.986								1.487	1.528
	0.599	1.255								1.52	3.047
	0.143	0.677								0.647	1.662
	0.378	0.899								1.268	2.472
	0.842	1.585								2.231	3.132
	0.221	0.773								0.604	1.781
	0.473	0.452								0.835	1.143
	1.185	1.641								2.06	2.613
	0.386	1.95								0.94	3.096
	0.443	0.921								1.351	2.077
	0.751	1.45								1.711	2.733
	0.226	1.168								0.574	2
	0.1	2.544								0.429	3.249
	0.148	2.692								0.57	2.75
	0.373	3.899								1.246	4.183
	0.46	2.544								1.038	3.882
	0.829	1.711								1.46	2.519
	0.412	1.181								0.945	2.38
	0.412	1.19								1.055	1.505
	0.473	2.575								1.147	3.337
	0.208	2.197								0.757	2.689
	0.634	1.155								1.566	2.63
	0.439	3.704								1.323	4.94
	0.261	1.828								0.859	2.542
	0.261	1.072								0.733	2.264
	0.161	1.268								0.486	2.119
	0.195	1.116								0.565	2.771
	0.46	1.02								1.154	1.567
	0.404	1.116								1.003	1.791
	1.711	1.685								2.613	2.327
	0.53	0.751								1.251	1.826
	0.2	1.233								0.582	2.1
	0.478	2.128								0.898	2.974
	0.495	2.531								1.364	3.24
	0.43	1.941								0.99	2.725
	0.417	1.146								1.061	2.33
	0.547	1.515								1.243	3.693
	0.894	0.829								1.552	2.619
	0.695	1.051								1.448	2.376
	0.495	0.53								1.109	1.344
	0.33	0.916								1.005	1.955
	0.317	1.576								0.706	3.446
	0.143	0.99								0.572	2.466
	0.495	1.628								0.943	3.179
	0.326	0.864								0.827	1.676
	0.343	0.834								0.726	1.614
	0.352	1.372								1.096	2.247
	0.564	0.96								1.451	1.757
	0.247	0.399								0.742	1.098
	0.36	0.999								0.796	2.251
	0.343	1.194								1.118	2.03
	0.721	0.669								1.366	1.831
	0.447	1.429								1.04	3.012
	0.321	1.945								0.898	2.765
	0.378	0.738								1.359	1.703
	0.621	0.868								1.903	1.462
	0.834	2.162								1.596	3.472
	0.287	1.12								0.641	1.709
	0.716	0.643								1.118	1.265
	0.508	0.682								0.895	1.711
	0.569	0.347								1.136	1.014
	0.712	0.426								1.303	1.115
	0.612	0.738								1.408	1.905
	0.569	0.764								1.323	2.296
	0.508	1.003								1.025	1.905
	1.112	1.785								1.87	2.625
	0.204	1.715								0.591	2.565
	0.994	1.745								1.612	2.879
	0.63	1.607								1.419	3.207
	0.426	1.103								1.213	1.748
	0.295	0.725								0.713	1.386
	0.213	0.808								0.603	2.101
	0.412	0.508								1.168	1.471
	0.308	0.955								0.737	1.932
	0.261	0.512								0.653	1.246
	0.204	0.343								0.656	1.037
	0.556	0.716								1.19	1.941
	0.391	1.363								0.791	2.588
	0.269	0.812								0.868	1.444
	0.499	0.651								1.216	1.467
	0.669	1.09								1.139	2.244
	0.934	1.446								1.451	2.464
	0.447	2.041								0.846	4.208
	0.79	1.641								1.487	2.735
	2.892	0.821								4.159	2.275
	2.206	0.977								3.861	2.4
	0.682	0.669								1.035	2.012
	0.43	1.003								0.938	2.098
	1.172	0.764								1.576	1.836
	0.577	1.007								1.233	1.865
	0.912	1.012								1.695	1.998
	0.677	0.838								1.261	2.045
	0.86	1.372								1.805	3.421
	0.968	1.858								1.511	4.081
	0.868	1.025								1.335	2.235
	0.673	0.773								1.147	1.678
	0.66	0.777								1.384	1.712
	0.521	1.259								1.28	1.873
	0.551	0.217								1.043	0.823
	0.3	2.371								0.712	3.276
Figure4d	Vinculin intensity
	WT	E-cadherin KO
	139.822	111.554
	146.689	111.477
	147.897	61.242
	152.024	95.333
	124.728	130.027
	144.177	139.525
	113.541	133.345
	134.95	93.327
	98.11	119.044
	143.718	143.032
	146.772	196.171
	151.915	184.267
	174.82	124.733
	144.638	137.187
	147.359	122.815
	166.694	144.617
	166.473	104.335
	141.941	137.814
	173.368	141.368
	148.111	138.464
	157.06	111.206
	163.554	109.342
	142.545	104.593
	137.625	103.141
	118.932	101.324
	138.427	106.312
	133.101	89.175
	134.05	91.642
	132.166	113.625
	142.61	115.292
	138.072	91.859
	140.567	91.788
	136.167	74.257
	155.977	102.466
	129.078	102.526
	109.505	106.816
	136.942	101.221
	122.606	108.351
	112.292	93.782
	96.884	136
	128.659	120.336
	118.063	143.966
	99.538	87.848
	112.734	106.119
	123.009	111.088
	147.215	90.635
	161.909	101.135
	151.887	96.494
	99.697	120.339
	121.246	110.505
	111.714	103.644
	113.603	108.882
	129.765	88.285
	129.106	60.073
Figure 4e
	Cytoplasmic	Nuclear	Uniform
WT	24.266	31.0017	44.7323
E-cadherin KO	6.38086	81.3559	12.2632
Raw data
WT		1	2	3	4				E-cadherin KO		1	2	3	4	5
	Cytoplasmic	96	54	105	26					Cytoplasmic	10	17	21	14	2
	Nuclear	65	39	40	215					Nuclear	62	39	54	407	254
	Uniform	67	40	75	336					Uniform	27	6	11	67	12
