# Supplementary material for: Investigating the nature of active forces in tissues reveals how contractile cells can form extensile monolayers
Source: Springer Nature journal article supplement (doi:10.1038/s41563-021-00919-2), 2021-02-18
Supplement: MOESM11 [file 41563_2021_919_MOESM11_ESM.xlsx]

## Sheet: Feuil1
Figure 5a
	Time	1	2
	0	0.4543	0.5317
	500	0.5066	0.502
	1000	0.5105	0.5211
	1500	0.5192	0.5383
	2000	0.548	0.5619
	2500	0.5787	0.5557
	3000	0.5559	0.575
	3500	0.5457	0.5646
	4000	0.5506	0.5731
	4500	0.5746	0.5722
	5000	0.5591	0.5944
	5500	0.5756	0.5862
	6000	0.5994	0.6019
	6500	0.6003	0.6075
	7000	0.6105	0.5922
	7500	0.6006	0.608
	8000	0.5948	0.6013
	8500	0.6038	0.5748
	9000	0.5811	0.5896
	9500	0.5802	0.5752
	10000	0.5896	0.5741
	10500	0.5927	0.5829
	11000	0.5976	0.6063
	11500	0.6157	0.611
	12000	0.6083	0.6142
	12500	0.6149	0.6001
	13000	0.6215	0.5974
	13500	0.6185	0.6145
	14000	0.6357	0.6318
	14500	0.6445	0.6257
	15000	0.6141	0.6125
	15500	0.604	0.6076
	16000	0.6233	0.6022
	16500	0.616	0.5999
	17000	0.5981	0.6071
	17500	0.6245	0.5901
	18000	0.6036	0.6211
	18500	0.6257	0.6173
	19000	0.6326	0.6304
	19500	0.6344	0.5995
	20000	0.6005	0.6182
	20500	0.6019	0.6
	21000	0.6058	0.6022
	21500	0.6111	0.6224
	22000	0.6235	0.6123
	22500	0.6203	0.6248
	23000	0.6411	0.6225
	23500	0.6364	0.6512
	24000	0.643	0.6482
	24500	0.6555	0.6525
Figure 5b	Mixing index _Experiments
	Time (hours)	1	2	3	4	5
	1	0.47205	0.626728	0.433333	0.420074	0.503106
	2	0.477341	0.633621	0.491803	0.503846	0.512121
	3	0.518414	0.585586	0.532663	0.536184	0.532967
	4	0.542929	0.587983	0.560976	0.544304	0.56701
	5	0.516854	0.53629	0.558036	0.57	0.544118
	6	0.57907	0.596639	0.591304	0.542587	0.575682
	7	0.56974	0.58209	0.597403	0.561129	0.55711
	8	0.562637	0.631579	0.585062	0.548077	0.595745
	9	0.617834	0.610932	0.576923	0.565217	0.624217
	10	0.612782	0.640411	0.59736	0.571038	0.588353
	11	0.644135	0.633152	0.614379	0.561308	0.610465
	12	0.645338	0.655612	0.650602	0.532067	0.615523
	13	0.619377	0.670762	0.642857	0.576733	0.601073
	14	0.651591	0.69469	0.675926	0.585034	0.632399
	15	0.646628	0.701271	0.659091	0.574032	0.639269
	20	0.695538	0.682731	0.642857	0.56	0.663073
	25	0.701987	0.696284	0.692177	0.603495	0.68533
	30	0.735991	0.694892	0.694737	0.586301	0.700378
	35	0.743075	0.665537	0.684597	0.638389	0.721925
	40	0.722118	0.726941	0.673978	0.65534	0.733006
