# Supplementary material for: Investigating the nature of active forces in tissues reveals how contractile cells can form extensile monolayers
Source: Springer Nature journal article supplement (doi:10.1038/s41563-021-00919-2), 2021-02-18
Supplement: MOESM12 [file 41563_2021_919_MOESM12_ESM.xlsx]

## Sheet: Feuil1
Figure 6c
Mixing index_blebbistatin- Experiments
	Time (hours)	1	2	3	4	5
	-5	0.473373	0.502857	0.474048	0.422383	0.44375
	-4	0.463612	0.515152	0.491468	0.438944	0.478134
	-3	0.523438	0.574124	0.506452	0.509375	0.495822
	-2	0.541063	0.649874	0.533724	0.4875	0.503876
	-1	0.575117	0.59867	0.541311	0.467967	0.557971
	0	0.506048	0.654584	0.578249	0.492837	0.515152
	1	0.51073	0.614173	0.556373	0.47644	0.497653
	2	0.508368	0.582524	0.551724	0.45974	0.477578
	3	0.495885	0.552529	0.545882	0.437018	0.468037
	4	0.454158	0.554475	0.533654	0.442935	0.460829
	5	0.441667	0.564453	0.532258	0.463918	0.461187
Circularity_blebbistatin treated - Experiments
	Time (hours)	1	2	3	4	5
	-225	0.588	0.679	0.799	0.794	0.715
	-210	0.583	0.654	0.788	0.807	0.713
	-195	0.58	0.589	0.742	0.829	0.736
	-180	0.551	0.628	0.689	0.816	0.712
	-165	0.492	0.634	0.625	0.851	0.798
	-150	0.438	0.684	0.571	0.771	0.718
	-135	0.404	0.735	0.607	0.737	0.696
	-120	0.428	0.741	0.658	0.709	0.779
	-105	0.434	0.678	0.687	0.664	0.794
	-90	0.494	0.628	0.697	0.614	0.836
	-75	0.508	0.672	0.603	0.626	0.833
	-60	0.537	0.615	0.605	0.53	0.846
	-45	0.553	0.59	0.637	0.448	0.851
	-30	0.569	0.705	0.63	0.527	0.745
	-15	0.626	0.722	0.699	0.602	0.675
	15	0.564	0.564	0.733	0.63	0.793
	30	0.442	0.61	0.732	0.671	0.718
	45	0.451	0.559	0.762	0.638	0.514
	60	0.433	0.572	0.704	0.752	0.348
	75	0.399	0.629	0.623	0.714	0.678
	90	0.439	0.676	0.629	0.786	0.532
	105	0.439	0.549	0.57	0.684	0.564
	120	0.407	0.619	0.612	0.635	0.591
	135	0.419	0.641	0.605	0.572	0.603
	150	0.4	0.635	0.614	0.541	0.58
	165	0.376	0.552	0.634	0.565	0.583
	180	0.354	0.536	0.615	0.56	0.628
	195	0.449	0.556	0.651	0.497	0.536
	210	0.433	0.53	0.639	0.497	0.487
	225	0.459	0.408	0.569	0.527	0.383
	240	0.448	0.371	0.577	0.577	0.312
	255	0.5	0.327	0.542	0.431	0.434
	270	0.545	0.351	0.624	0.549	0.483
	285	0.474	0.386	0.624	0.594	0.615
	300	0.519	0.516	0.636	0.563	0.625
	315	0.546	0.455	0.668	0.456	0.61
	330	0.532	0.411	0.686	0.547	0.722
	345	0.555	0.389	0.624	0.564	0.602
	360	0.577	0.33	0.554	0.574	0.608
	375	0.596	0.325	0.497	0.417	0.626
	390	0.605	0.384	0.477	0.608	0.524
	405	0.614	0.478	0.241	0.463	0.562
	420	0.615	0.564	0.463	0.434	0.408
	435	0.59	0.655	0.505	0.415	0.577
	450	0.561	0.685	0.54	0.507	0.494
	465	0.554	0.669	0.53	0.535	0.452
	480	0.535	0.698	0.499	0.551	0.668
	495	0.526	0.737	0.482	0.492	0.795
	510	0.502	0.722	0.516	0.504	0.609
