# Supplementary material for: Investigating the nature of active forces in tissues reveals how contractile cells can form extensile monolayers
Source: Springer Nature journal article supplement (doi:10.1038/s41563-021-00919-2), 2021-02-18
Supplement: MOESM13 [file 41563_2021_919_MOESM13_ESM.xlsx]

## Sheet: Feuil1
Figure S1
	Short	Medium	Long
	0.29	0.09	0.07
	0.15	0.265	0.08
	0.64	0.1157	0.107
	0.29	0.358	0.135
	0.546	0.348	0.168
	0.878	0.449	0.116
	0.252	0.164	0.3617
	0.119	0.116	0.08
	0.1445	0.307	0.258
		0.1217	0.117
		0.147	0.159
		0.319	0.106
		0.61
