# Supplementary material for: Investigating the nature of active forces in tissues reveals how contractile cells can form extensile monolayers
Source: Springer Nature journal article supplement (doi:10.1038/s41563-021-00919-2), 2021-02-18
Supplement: MOESM14 [file 41563_2021_919_MOESM14_ESM.xlsx]

## Sheet: Feuil1
Extended Figure 4a
E-cad_blot
WT			E-cad KO			E-cad rescue GFP
mean	sd	n	mean	sd	n	mean	sd	n
1	0	3	0.122737	0.0390527	3	1.05557	0.0128923	3
Extended Figure 4b
b-catenin_blot
WT	E-cad KO
1	0.199053
1	0.251096
1	0.586805
Extended Figure 4c
MLC2 total_blot
WT	E-cad KO
1	1.29059
1	1.45525
1	1.79677
Extended Figure 4d
Vinculin_blot
WT	E-cad KO
1	0.632441
1	0.975061
1	0.892523
