# Supplementary material for: Investigating the nature of active forces in tissues reveals how contractile cells can form extensile monolayers
Source: Springer Nature journal article supplement (doi:10.1038/s41563-021-00919-2), 2021-02-18
Supplement: MOESM15 [file 41563_2021_919_MOESM15_ESM.xlsx]

## Sheet: Feuil1
Western blot E-cadherin KD of MCF 7A cells
