# Supplementary material for: Investigating the nature of active forces in tissues reveals how contractile cells can form extensile monolayers
Source: Springer Nature journal article supplement (doi:10.1038/s41563-021-00919-2), 2021-02-18
Supplement: MOESM16 [file 41563_2021_919_MOESM16_ESM.xlsx]

## Sheet: Feuil1
Extended Figure 6b	Total number of defects
		WT												E-cad KO
	Time (mins)	1	2	3	4	5	6	7	8	9	10			1	2	3	4	5	6	7	8	9	10
	10	9	14	16	10	11	11	16	7	17	9			12	29	19	13	18	9	22	17	5	14
	20	13	20	20	16	18	23	20	25	26	16			16	34	28	18	21	13	31	21	17	23
	30	16	17	13	19	16	27	13	27	22	24			17	34	28	15	14	11	27	16	19	22
	40	19	18	17	13	19	27	20	25	16	29			15	32	33	16	18	8	18	16	19	22
	50	22	20	17	15	20	24	22	23	12	23			19	29	30	16	20	11	16	9	24	24
	60	20	18	8	18	19	28	20	21	14	20			22	33	22	20	18	11	20	12	21	30
	70	20	18	6	23	24	33	22	22	23	18			19	35	26	24	18	14	19	15	14	31
	80	23	16	11	23	20	28	24	26	28	23			19	33	30	23	21	15	24	18	16	35
	90	20	17	15	19	12	22	21	22	24	28			21	31	37	22	23	13	31	20	12	34
	100	23	16	21	19	19	21	21	16	22	36			22	31	33	17	23	17	30	24	16	30
	110	17	13	21	18	23	23	27	20	21	39			17	29	34	19	20	16	24	17	19	31
	120	16	15	15	19	21	27	28	26	23	26			16	27	35	22	24	17	26	14	18	26
	130	17	20	14	20	16	23	23	19	26	16			16	29	28	22	20	18	29	23	14	25
	140	15	28	15	21	14	26	24	18	25	20			20	33	27	15	18	19	31	17	13	20
	150	17	23	16	20	11	26	30	26	25	22			20	29	21	14	23	18	26	14	18	19
	160	17	16	17	17	11	32	20	24	22	28			18	25	20	17	24	16	28	14	13	24
	170	15	23	17	19	12	31	17	20	26	23			15	26	28	17	23	20	22	12	11	31
	180	14	19	18	19	15	32	16	20	25	23			14	23	33	16	27	20	23	15	13	35
	190	18	16	22	20	22	25	17	23	24	17			15	30	30	16	24	14	23	14	15	32
	200	18	20	21	22	17	20	24	23	24	22			17	32	33	20	20	18	29	13	12	31
	210	20	18	20	24	13	22	23	26	20	31			19	34	36	18	17	17	32	17	10	31
	220	19	14	22	23	19	27	20	24	20	32			21	36	32	19	22	17	24	17	7	29
	230	19	14	15	17	21	28	19	20	19	31			21	29	29	17	22	14	25	20	12	30
	240	27	11	16	15	19	24	18	10	31	33			21	25	35	17	15	13	27	18	13	33
Extended Figure 6e	MSD average
		MDCK WT																										E-cad Ko
		Plus half defect												Minus half defect														Plus half defect													Minus half defect
	Time lag (mins)	1	2	3	4	5	6	7	8	9	10	11		1	2	3	4	5	6	7	8	9	10	11				1	2	3	4	5	6	7	8	9	10	11	12		1	2	3	4	5	6	7	8	9
	10	110.21	101.786	106.906	80.1646	71.8968	76.4587	87.6544	259.101	238.16	136.479	167.014		52.6108	92.3355	124.737	29.8189	32.4403	142.182	179.61	11.776	18.2272	53.9502	13.7216				33.1264	40.704	108.597	45.097	74.2059	41.7441	78.3042	117.178	193.205	89.7024	123.57	57.4259		74.2468	119.322	80.9049	37.0005	42.6929	27.3315	19.7738	50.1493	40.2038
	20	308.721	213.46	169.79	131.198	164.966	85.3457	195.119	511.181	308.941	225.872	593.042		74.9568	105.74	159.51	33.2361	41.5061	225.631	375.03	20.8896	20.48	78.8007	13.1982				52.7019	127.21	270.724	32.586	94.5212	65.9576	128.848	158.037	316.075	187.82	287.448	95.3721		158.755	198.632	144.365	56.2885	91.9893	34.6405	23.8738	54.514	83.5584
	30	563.988	310.477	226.281	212.446	282.242	119.931	336.691	444.006	544.885	401.92	1281.71		54.0672	107.588	251.305	42.3463	54.272	172.919	365.158	18.8416	34.3552	69.632	21.7088				82.9147	218.795	435.095	59.648	99.2	75.0933	116.326	200.455	656.403	254.607	435.429	142.723		212.29	261.536	151.532	67.0106	97.1124	28.7539	23.241	61.323	109.326
	40	875.179	424.673	340.884	332.446	469.753	178.768	535.211	424.755	825.344	434.235	2064.38		82.4661	111.56	348.16	42.8715	42.3643	211.272	208.35	20.5619	26.7995	58.9452	23.8738				100.289	318.996	664.883	67.7595	97.4848	80.9728	144.746	246.356	895.877	209.351	548.25	188.32		221.73	291.84	166.543	78.4043	74.752	36.6484	23.3787	78.5613	129.27
	50	1294.19	456.294	438.886	434.012	687.624	235.11	646.963	770.594	1126.65	495.957	3055.62		106.496	89.7843	404.834	38.5769	72.3627	342.118	17.6128	7.4752	26.4192	53.7805	34.5429				132.164	450.97	950.541	68.1301	135.929	100.696	146.67	234.525	1279.04	146.637	689.548	219.341		236.969	355.467	218.295	60.0331	66.6738	37.1371	26.4765	77.0048	145.089
	60	1650.52	635.153	571.365	505.537	946.995	325.573	733.769	1140.33	1532.93	561.07	4566.63		118.784	62.8053	501.187	39.1578	94.0442	436.224	92.16	8.46507	21.0534	57.6626	39.6493				186.74	590.234	1256.27	92.2419	112.167	95.0272	152.235	266.486	1490.53	135.987	889.885	251.549		285.54	360.025	278.528	62.9481	120.269	28.7202	22.7328	97.2117	191.693
	70	1997.94	617.677	687.66	590.643	1277.21	443.187	888.286	1436.88	1958.16	747.622	5849.7		206.985	83.1488	488.971	41.5061	74.9568	268.698		4.3008	21.7088	104.346	56.32				234.783	728.678	1558.4	86.016	133.666	93.3323	146.957	340.615	1763.85	219.273	1133.9	288.358		329.267	387.185	300.622	61.323	136.104	31.4368	20.2307	111.411	250.909
	80	2352.54	571.802	850.96	726.045	1656.42	500.04	1029.24		2190.13	937.165	7051.67		211.354	138.094	444.211	41.5744	83.5584	98.7136		1.6384	24.4395	116.56	85.1968				309.339	1009.66	1904.67	129.843	192.735	106.876	126.157	383.75	2026.15	374.211	1399.6	318.984		359.593	428.427	345.267	74.4858	107.793	28.5082	24.2781	128.512	274.705
	90	2746.19		907.264	883.917	2027.06	730.726	1335.3		3308.34	1099.57			106.496	120.969	401.174	19.6608	132.71				44.2368	75.7077	96.256				338.893		2342.73	108.544	196.321	120.559	168.677	449.982	2409.1	471.04	1642.72	323.857		399.211	519.1	368.012	85.3477	84.4595	23.7568	24.576	131.181	337.838
	100	3134.26		1096.83	1170.15	2565.73	786.432	1649.87			806.912				163.185	324.676	21.0261	209.715				75.776	58.0813	142.95				396.493		2836.96	256	192.558	131.466	198.492	468.582	2673.87	455.475	1980.99	318.445		431.582	635.274	409.483	77.824	111.923	25.7103	31.8669	136.221	405.094
	110	3530.1		1215.04	1464.73	3152.52	765.952	2098.79							126.566	329.646	18.0224						94.3104					475.068		3401.06		207.974	127.566	172.636	444.225	3058.89	280.986	2238.96	267.059		430.612	748.077	418.769	91.389	208.896	29.9008	33.7165	160.437	500.258
	120	3740.47		1294.52	1539	3627.96	642.253	2582.12							56.7979	166.298	19.6608						111.957					523.633		3993.64		262.846	129.775	213.72	479.466	3377.56	322.765	2410.29	210.443		413.222	761.856	458.377	79.3856	241.869	35.8959	26.2144	156.058	566.886
	130	3737.19		1705.57	2086.5	3877.77									61.44	161.655	34.9525						101.376					554.701		4678.44		222.686	121.99	220.606	500.72	4038.66		2491.54	132.915		409.099	755.641	561.338	92.5969	285.491	44.2368	24.3832	157.733	453.837
	140	3779.79		2007.27	1974.27	4348.31									60.6208	169.574	18.0224
	150	4038.66		2308.23		4542.74											40.96
[truncated: 3 more columns]
