# Supplementary material for: Investigating the nature of active forces in tissues reveals how contractile cells can form extensile monolayers
Source: Springer Nature journal article supplement (doi:10.1038/s41563-021-00919-2), 2021-02-18
Supplement: MOESM17 [file 41563_2021_919_MOESM17_ESM.xlsx]

## Sheet: Feuil1
Extended Figure 9- Colocalization of vinculin and paxillin
		WT				E-cad KO
		Vinculin intensity	Paxillin intensity			Vinculin intensity	Paxillin intensity
	1	40.165	39.021		1	38.233	47.893
	2	31.139	25.257		2	33.738	41.26
	3	21.805	22.607		3	15.697	17.823
	4	21.183	21.834		4	19.999	24.173
	5	19.841	20.965		5	23.128	31.898
	6	20.647	26.482		6	33.29	33.777
	7	24.219	29.478		7	30.574	36.797
	8	30.364	40.591		8	22.314	26.901
	9	21.285	21.996		9	36.712	44.736
	10	24.825	35.175		10	37.25	40.043
	11	33.686	46.864		11	43.092	41.941
	12	67.064	54.452		12	43.671	40.487
	13	38.553	35.037		13	47.857	52.643
	14	48.468	36.705		14	46.388	51.777
	15	83.108	61.409		15	34.854	47.197
	16	33.935	30.744		16	31.952	46.471
